# Supplementary material for: The syntheses, structures and azo–hydrazone tautomeric studies of three triazole/tetrazole azo dyes
Source: Royal Society of Chemistry journal article supplement (doi:10.1039/c5nj02539g), 2016-01-01
Supplement: c5nj02539g1.pdf [file c5nj02539g1.pdf]

# The syntheses, structural and azo-hydrazone tautomeric studies of three triazole/tetrazole azo dyes

Jiawei Cai, Zhixin Li, Yanxuan Qiu, Zhijian OuYang, Wenning Lin, Liu Yang, Weijin Feng,  
Xinwei Yu and Wen Dong\*

School of Chemistry and Chemical Engineering, Guangzhou Key Laboratory for Environmentally Functional Materials and Technology, Guangzhou University, Guangzhou, 510006, China

**Table S1.** The crystal data and data collection parameters for H<sub>2</sub>ATN, [Ni(H<sub>2</sub>AD)<sub>2</sub>] 4H<sub>2</sub>O and ring-closure product of H<sub>3</sub>AD.

|                                         | H <sub>2</sub> ATN                                                          | [Ni(H <sub>2</sub> AD) <sub>2</sub> ] 4H <sub>2</sub> O          | ring-closure product of H <sub>3</sub> AD.        |
|-----------------------------------------|-----------------------------------------------------------------------------|------------------------------------------------------------------|---------------------------------------------------|
| CCDC number                             | 1407822                                                                     | 1410476                                                          | 1407823                                           |
| formula                                 | C <sub>11</sub> H <sub>8</sub> N <sub>6</sub> O                             | C <sub>24</sub> H <sub>24</sub> N <sub>10</sub> NiO <sub>8</sub> | C <sub>12</sub> H <sub>7</sub> N <sub>5</sub> O   |
| Formula weight                          | 240.23                                                                      | 639.22                                                           | 237.23                                            |
| Crystal system                          | monoclinic                                                                  | trigonal                                                         | monoclinic                                        |
| Space group                             | <i>P</i> 2 <sub>1</sub> / <i>n</i>                                          | <i>P</i> -3 <i>c</i> 1                                           | <i>P</i> 2 <sub>1</sub> / <i>n</i>                |
| <i>a</i> / Å                            | 7.1366(3)                                                                   | 17.1166(4)                                                       | 3.7787(3)                                         |
| <i>b</i> / Å                            | 16.9882(6)                                                                  | 17.1166(4)                                                       | 15.4361(13)                                       |
| <i>c</i> / Å                            | 9.4410(4)                                                                   | 18.4282(5)                                                       | 17.0098(14)                                       |
| <i>α</i> / °                            | 90.00                                                                       | 90.00                                                            | 90.00                                             |
| <i>β</i> / °                            | 112.008(2)                                                                  | 90.00                                                            | 92.735(6)                                         |
| <i>γ</i> / °                            | 90.00                                                                       | 120.00                                                           | 90.00                                             |
| <i>V</i> / Å <sup>3</sup>               | 1061.20(7)                                                                  | 4675.7(3)                                                        | 991.02(14)                                        |
| <i>Z</i>                                | 4                                                                           | 6                                                                | 4                                                 |
| $\rho_{\text{calc}}$ mg/mm <sup>3</sup> | 1.504                                                                       | 1.362                                                            | 1.590                                             |
| <i>m</i> /mm <sup>-1</sup>              | 0.106                                                                       | 0.682                                                            | 0.110                                             |
| <i>F</i> (000)                          | 496.0                                                                       | 1980.0                                                           | 488.0                                             |
| Reflections collected                   | 8967                                                                        | 72395                                                            | 14370                                             |
| Independent reflections                 | 2437 [R <sub>int</sub> = 0.0259]                                            | 3633 [R <sub>int</sub> = 0.1394]                                 | 2280 [R <sub>int</sub> = 0.0776]                  |
| Goodness-of-fit on F <sup>2</sup>       | 1.017                                                                       | 1.036                                                            | 0.986                                             |
| Final R indexes [I>=2σ(I)]              | R <sub>1</sub> = 0.0394, <sup>a</sup> wR <sub>2</sub> = 0.0917 <sup>b</sup> | R <sub>1</sub> = 0.0686, wR <sub>2</sub> = 0.2009                | R <sub>1</sub> = 0.0505, wR <sub>2</sub> = 0.1083 |
| Final R indexes [all data]              | R <sub>1</sub> = 0.0682, wR <sub>2</sub> = 0.1051                           | R <sub>1</sub> = 0.1158, wR <sub>2</sub> = 0.2403                | R <sub>1</sub> = 0.1305, wR <sub>2</sub> = 0.1400 |

<sup>a</sup>R =  $\sum ||F_o| - |F_c|| / \sum |F_o|$ . <sup>b</sup>wR<sub>2</sub> =  $[\sum w(F_o^2 - F_c^2)^2 / \sum w(F_o^2)^2]^{1/2}$

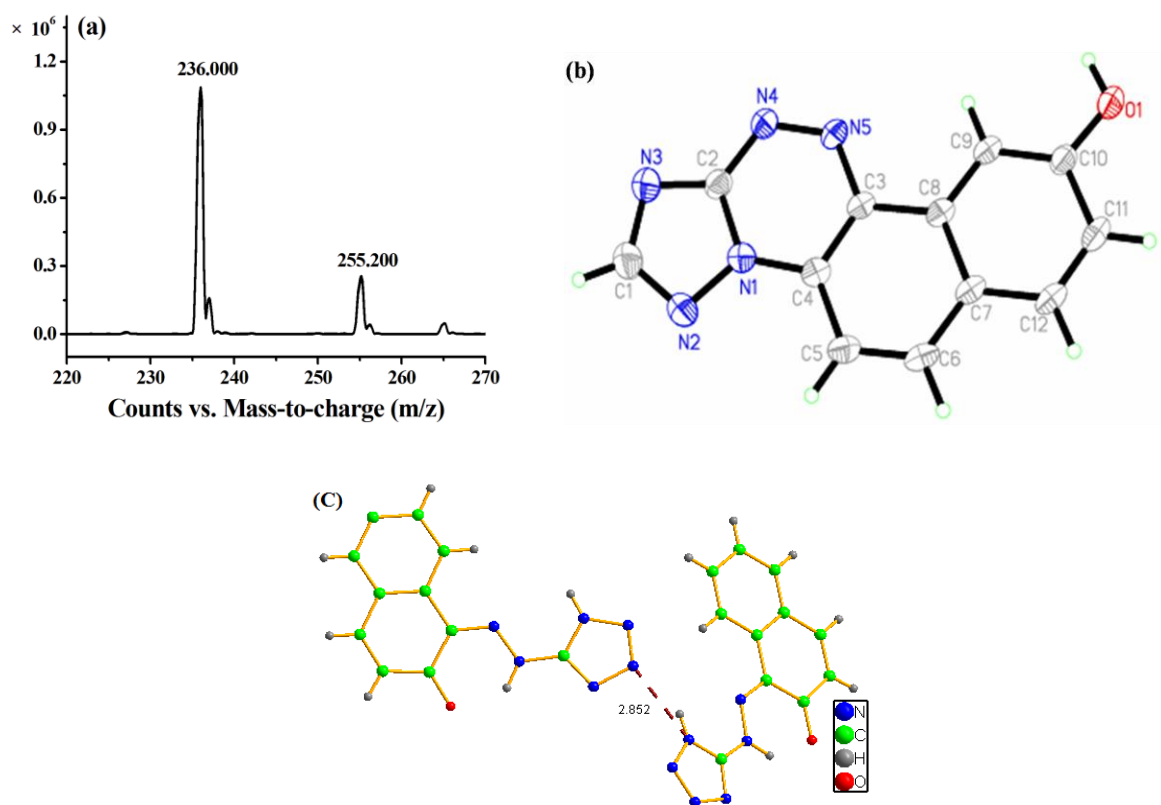

**Fig. S1** (a) Mass spectrum for ring-closure product of H<sub>3</sub>AD. (b) The atomic labeling diagram for ring-closure product of H<sub>3</sub>AD. (c) The intramolecular N-H...N hydrogen bonding in H<sub>2</sub>ATN.

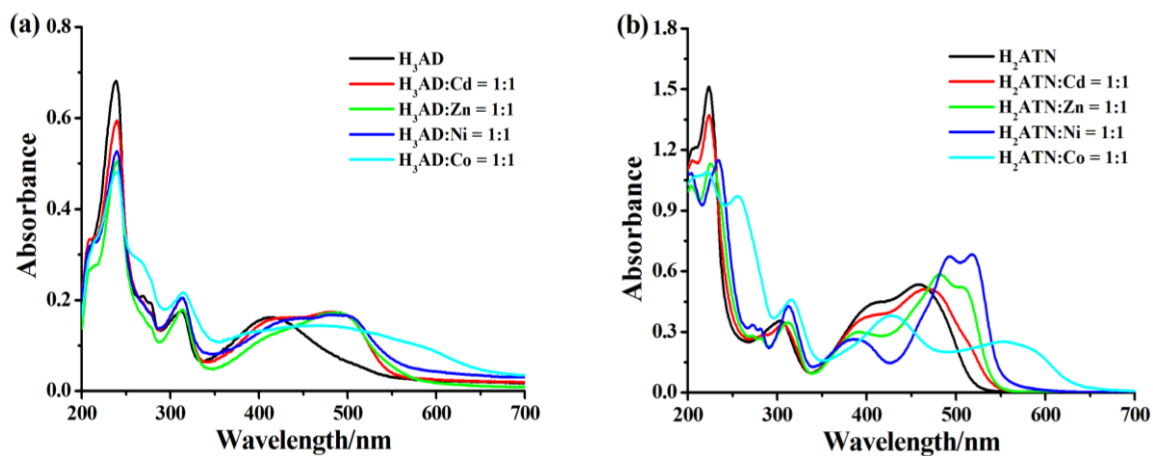

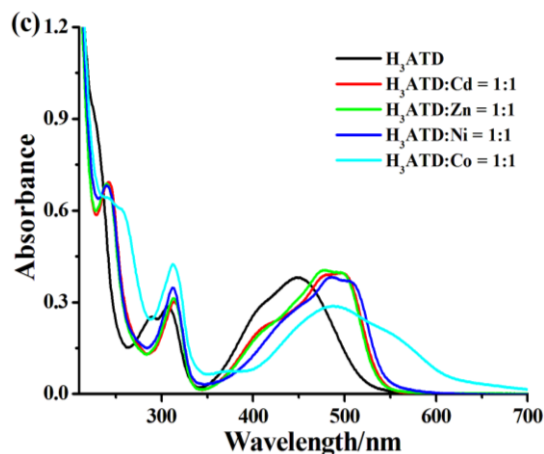

**Fig. S2** (a), (b), (c) UV-vis spectra of  $H_3AD$ ,  $H_2ATN$  and  $H_3ATD$  and their mixed solution with transition metal ions, respectively.

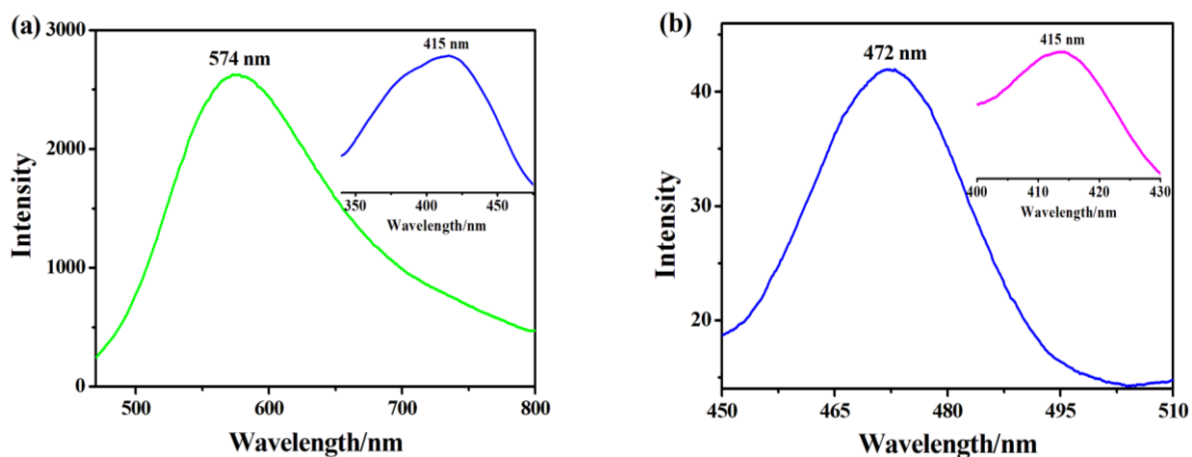

**Fig. S3** Room-temperature emission spectra for the neutral ethanol solution (a) and basic ethanol solution (b) of  $H_3AD$  with the same concentration.

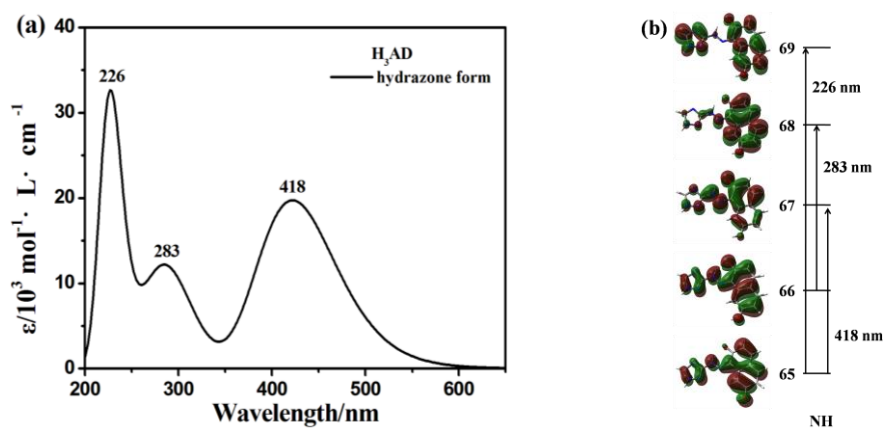

**Fig. S4** (a) The calculated electronic spectrum of H<sub>3</sub>AD in hydrazone form in aqueous solution. (b) The molecular orbitals involved in the main electronic transitions for hydrazone form of H<sub>3</sub>AD.

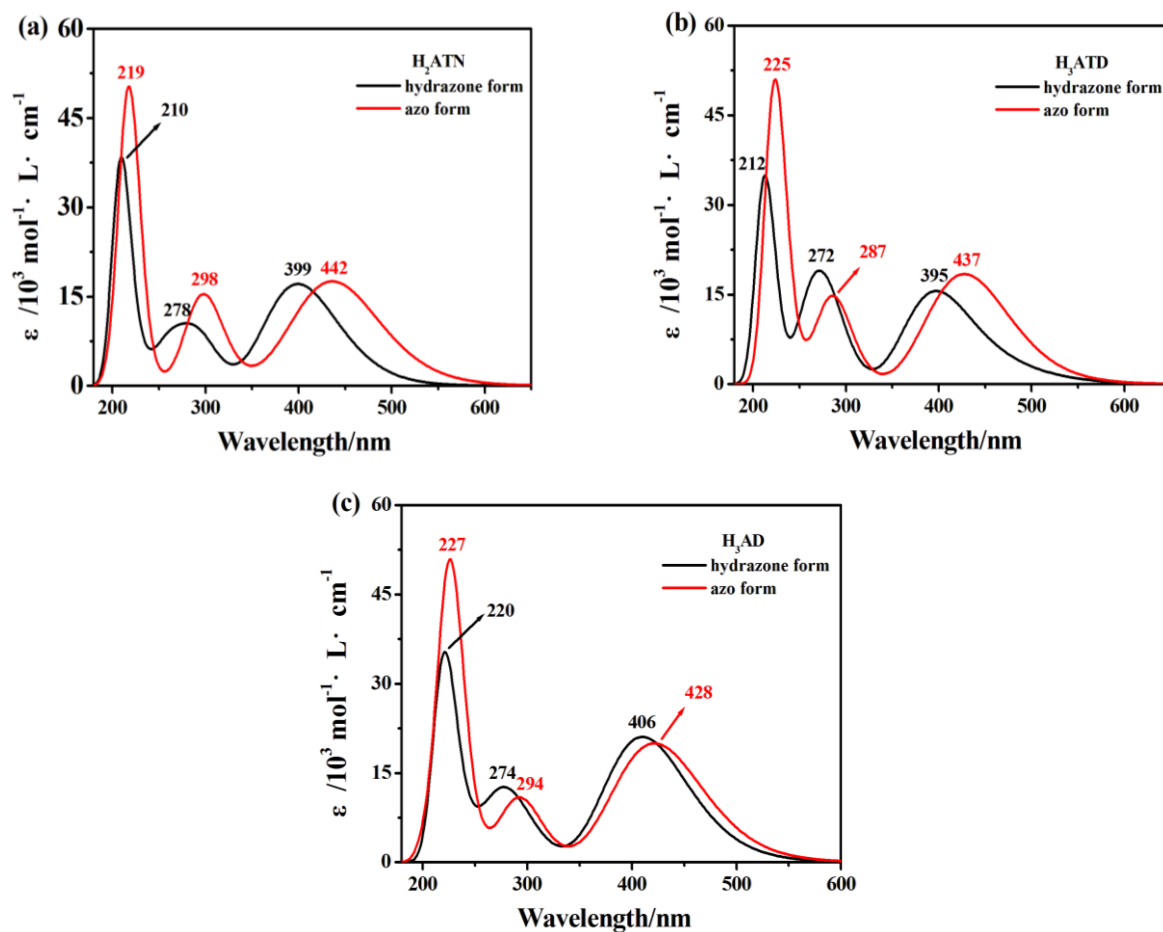

**Fig. S5** The calculated electronic spectra of H<sub>2</sub>ATN (a), H<sub>3</sub>ATD (b) and H<sub>3</sub>AD (c) in hydrazone and azo forms in aqueous solution using time dependent density functional theory (TD-DFT) at mPW1PW91/6-311++G(d,p) level.

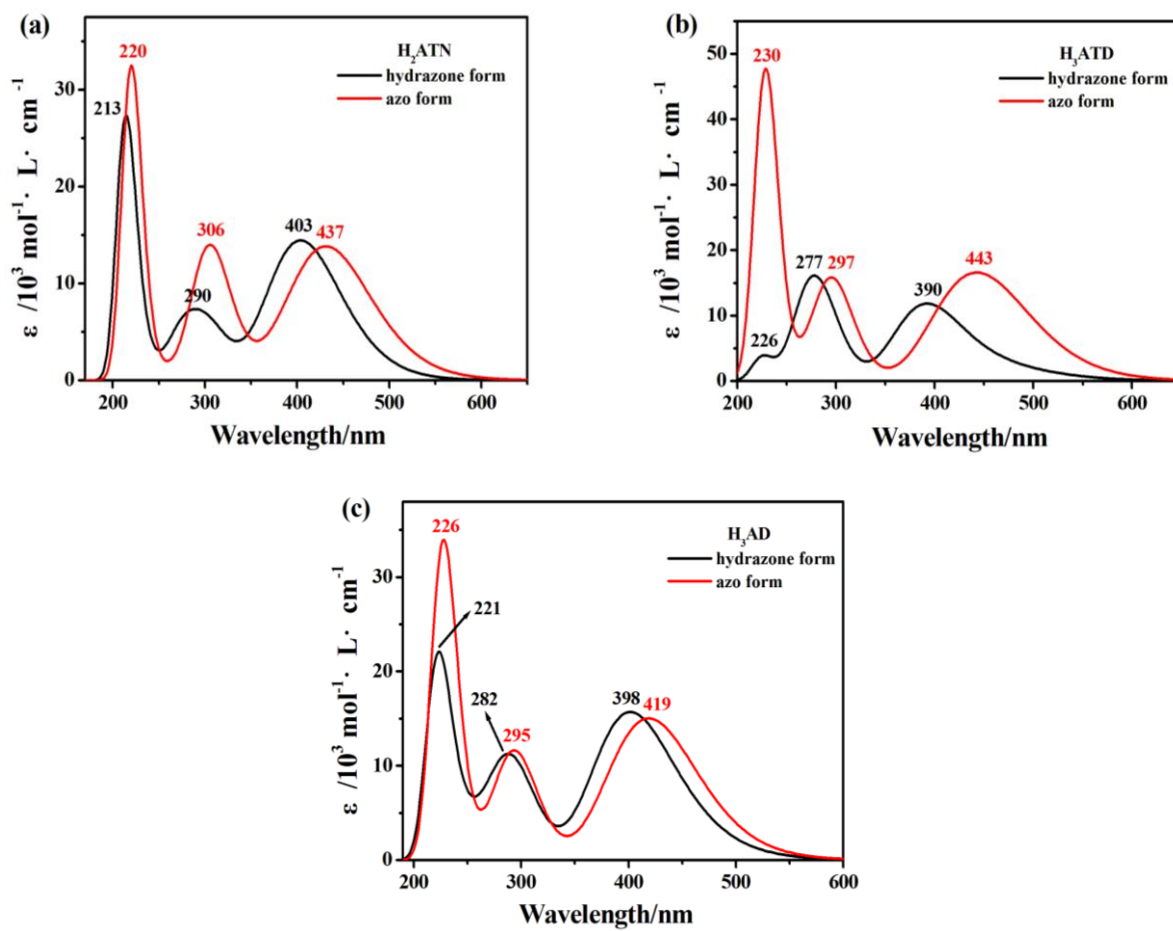

**Fig. S6** The calculated electronic spectra of  $H_2ATN$  (a),  $H_3ATD$  (b) and  $H_3AD$  (c) in hydrazone and azo forms in gas phase using time dependent density functional theory (TD-DFT) at B3LYP/6-311++G(d,p) level.
